# Supplementary material
Source: HighWire-hosted journal article supplement (https://bmjopen.bmj.com/content/14/2/e079549)
Supplement: inline-supplementary-material-2 [file inline-supplementary-material-2.pdf]

Informal coercion in mental health/psychiatry.

Search strategies and figures

**MEDLINE**

1. Coercion/
2. coerc\*.ab. or coerc\*.ti.
3. 1 or 2
4. (informal or subtle or soft\* or hidden or mild or modest or covert or Leverage or Threat\* or Pressur\* or Persua\* or Power or Influen\* or Intimidat\* or Blackmail\* or Negotiat\* or Inducement or Deception\* or Restrict\* or perception\* or perceiv\*).ab. or (informal or subtle or soft\* or hidden or mild or modest or covert or Leverage or Threat\* or Pressur\* or Persua\* or Power or Influen\* or Intimidat\* or Blackmail\* or Negotiat\* or Inducement or Deception\* or Restrict\* or perception\* or perceiv\*).ti.
5. perception/
6. 4 or 5
7. 3 and 6
8. "treatment pressure\*".ab. or "treatment pressure\*".ti.
9. 7 or 8
10. Mental Health Services/
11. Hospitals, Psychiatric/
12. Psychiatric Department, Hospital/
13. Mental Disorders/
14. exp "Bipolar and Related Disorders"/
15. depressive disorder/ or depressive disorder, treatment-resistant/
16. exp "Schizophrenia Spectrum and Other Psychotic Disorders"/
17. exp Personality Disorders/
18. Mentally Ill Persons/
19. Psychiatry/
20. (Psychiatric or Psychiatry or Mental or Mentally or "Bipolar disorder\*" or Depression or Depressive or Schizo\* or Psychotic or Psychosis or Psychoses or "Personality disorder\*").ab. or (Psychiatric or Psychiatry or Mental or Mentally or "Bipolar disorder\*" or Depression or Depressive or Schizo\* or Psychotic or Psychosis or Psychoses or "Personality disorder\*").ti.
21. 10 or 11 or 12 or 13 or 14 or 15 or 16 or 17 or 18 or 19 or 20
22. 9 and 21

= 949 results (November 22, 2023)

---

#### EMBASE

1. coercion/
2. coerc\*.ab. or coerc\*.ti.
3. 1 or 2
4. (informal or subtle or soft\* or hidden or mild or modest or covert or Leverage or Threat\* or Pressur\* or Persua\* or Power or Influenc\* or Intimidat\* or Blackmail\* or Negotiat\* or Inducement or Deception\* or Restrict\* or perception\* or perceiv\*).ab. or (informal or subtle or soft\* or hidden or mild or modest or covert or Leverage or Threat\* or Pressur\* or Persua\* or Power or Influenc\* or Intimidat\* or Blackmail\* or Negotiat\* or Inducement or Deception\* or Restrict\* or perception\* or perceiv\*).ti.
5. perception/
6. 4 or 5
7. 3 and 6
8. "treatment pressure\*".ab. or "treatment pressure\*".ti.
9. 7 or 8
10. mental health service/
11. mental hospital/
12. exp psychiatric department/
13. mental disease/
14. depression/ or exp bipolar disorder/ or chronic depression/ or depressive psychosis/ or major depression/ or treatment resistant depression/
15. exp schizophrenia spectrum disorder/
16. exp psychosis/
17. exp personality disorder/
18. mental patient/
19. psychiatry/
20. (Psychiatric or Psychiatry or Mental or Mentally or "Bipolar disorder\*" or Depression or Depressive or Schizo\* or Psychotic or Psychosis or Psychoses or "Personality disorder\*").ab. or (Psychiatric or Psychiatry or Mental or Mentally or "Bipolar disorder\*" or Depression or Depressive or Schizo\* or Psychotic or Psychosis or Psychoses or "Personality disorder\*").ti.
21. 10 or 11 or 12 or 13 or 14 or 15 or 16 or 17 or 18 or 19 or 20

22. 9 and 21

= 1319 results (November 22, 2023)

---

### PsycINFO

1. coercion/
2. coerc\*.ab. or coerc\*.ti.
3. 1 or 2
4. (informal or subtle or soft\* or hidden or mild or modest or covert or Leverage or Threat\* or Pressur\* or Persua\* or Power or Influenc\* or Intimidat\* or Blackmail\* or Negotiat\* or Inducement or Deception\* or Restrict\* or perception\* or perceiv\*).ab. or (informal or subtle or soft\* or hidden or mild or modest or covert or Leverage or Threat\* or Pressur\* or Persua\* or Power or Influenc\* or Intimidat\* or Blackmail\* or Negotiat\* or Inducement or Deception\* or Restrict\* or perception\* or perceiv\*).ti.
5. perception/
6. 4 or 5
7. 3 and 6
8. "treatment pressure\*".ab. or "treatment pressure\*".ti.
9. 7 or 8
10. mental health services/
11. psychiatric hospitals/ or psychiatric units/
12. mental disorders/
13. exp bipolar disorder/
14. exp major depression/
15. exp psychosis/
16. exp personality disorders/
17. psychiatric patients/
18. psychiatry/
19. (Psychiatric or Psychiatry or Mental or Mentally or "Bipolar disorder\*" or Depression or Depressive or Schizo\* or Psychotic or Psychosis or Psychoses or "Personality disorder\*").ab. or (Psychiatric or Psychiatry or Mental or Mentally or "Bipolar disorder\*" or Depression or Depressive or Schizo\* or Psychotic or Psychosis or Psychoses or "Personality disorder\*").ti.
20. 10 or 11 or 12 or 13 or 14 or 15 or 16 or 17 or 18 or 19

21. 9 and 20

= 1333 results (November 23, 2023)

---

### CINAHL

|     |                                                                                                                                                                                                                                                                                                                                                                                                                                                                                                                                           |
|-----|-------------------------------------------------------------------------------------------------------------------------------------------------------------------------------------------------------------------------------------------------------------------------------------------------------------------------------------------------------------------------------------------------------------------------------------------------------------------------------------------------------------------------------------------|
| S11 | S7 AND S10                                                                                                                                                                                                                                                                                                                                                                                                                                                                                                                                |
| S10 | S8 OR S9                                                                                                                                                                                                                                                                                                                                                                                                                                                                                                                                  |
| S9  | TI ( Psychiatric OR Psychiatry OR Mental OR Mentally OR "Bipolar disorder*" OR Depression OR Depressive OR Schizo* OR Psychotic OR Psychosis OR Psychoses OR "Personality disorder*" ) OR AB ( Psychiatric OR Psychiatry OR Mental OR Mentally OR "Bipolar disorder*" OR Depression OR Depressive OR Schizo* OR Psychotic OR Psychosis OR Psychoses OR "Personality disorder*" )                                                                                                                                                          |
| S8  | (MH "Mental Health Services") OR (MH "Hospitals, Psychiatric") OR (MH "Psychiatric Units") OR (MH "Mental Disorders") OR (MH "Personality Disorders+") OR (MH "Psychotic Disorders+") OR (MH "Depression") OR (MH "Bipolar Disorder") OR (MH "Psychiatric Patients") OR (MH "Psychiatry")                                                                                                                                                                                                                                                 |
| S7  | S5 OR S6                                                                                                                                                                                                                                                                                                                                                                                                                                                                                                                                  |
| S6  | AB "treatment pressure*" OR TI "treatment pressure*"                                                                                                                                                                                                                                                                                                                                                                                                                                                                                      |
| S5  | S3 AND S4                                                                                                                                                                                                                                                                                                                                                                                                                                                                                                                                 |
| S4  | TI ( informal OR subtle OR soft* OR hidden OR mild OR modest OR covert OR Leverage OR Threat* OR Pressur* OR Persua* OR Power OR Influenc* OR Intimidat* OR Blackmail* OR Negotiat* OR Inducement OR Deception* OR Restrict* OR perception* or perceiv*) OR AB ( informal OR subtle OR soft* OR hidden OR mild OR modest OR covert OR Leverage OR Threat* OR Pressur* OR Persua* OR Power OR Influenc* OR Intimidat* OR Blackmail* OR Negotiat* OR Inducement OR Deception* OR Restrict* OR perception* or perceiv*) OR (MH "perception") |
| S3  | S1 OR S2                                                                                                                                                                                                                                                                                                                                                                                                                                                                                                                                  |
| S2  | TI coerc* OR AB coerc*                                                                                                                                                                                                                                                                                                                                                                                                                                                                                                                    |
| S1  | (MH "Coercion")                                                                                                                                                                                                                                                                                                                                                                                                                                                                                                                           |

= 618 results (November 27, 2023)

---

**Number of identified results : 5397 (5024 anglais ou français ; 373 autres langues)**

**Number of duplicates : 3111**

**GRAND TOTAL :**

**2124 ANG or FR**

**162 other languages**

**Total of 2286 results**
